# Supplementary material for: Daytime temperature is sensed by phytochrome B in Arabidopsis through a transcriptional activator HEMERA
Source: PubMed Central journal article supplement (PMC6329817; doi:10.1038/s41467-018-08059-z), 2019-01-11
Supplement: 41467_2018_8059_MOESM1_ESM.pdf [file 41467_2018_8059_MOESM1_ESM.pdf]

**Supplementary Table 1.** qRT-PCR primers for the genes examined in this study.

| <b>Accession</b> | <b>Gene name</b> | <b>Forward primer</b>     | <b>Reverse primer</b>     |
|------------------|------------------|---------------------------|---------------------------|
| AT1G69960        | <i>PP2A</i>      | TATCGGATGACGATTCTTCGTGCAG | GCTTGGTCGACTATCGAATGAGAG  |
| AT2G43010        | <i>PIF4</i>      | AACCAGATCATCTCCGACCGGTTT  | TCCCGCCGGTGA ACTAAATCTCAA |
| AT4G28720        | <i>YUC8</i>      | TGAAACAAAACAACCCACGA      | TTGATTGCTTTGGGTCTTC       |
| AT3G15540        | <i>IAA19</i>     | ATCGGTGTGGCCTTGAAAG       | AACATCCCCCAAGGTACATC      |
| AT4G32280        | <i>IAA29</i>     | CACCATCATTGCCCGTATCA      | CCACAGTAGCCGTTGTTGGA      |

**Supplementary Table 2.** Primers used for making the bait and prey constructs for the GST pulldown assays.

| <b>Accession</b> | <b>Gene name</b> | <b>Vector</b>   | <b>Forward primer</b>             | <b>Reverse primer</b>              |
|------------------|------------------|-----------------|-----------------------------------|------------------------------------|
| AT2G34640        | <i>HMR</i>       | pET42b          | GGCGAATTCTATGGCGTCAATATCAACCACCAC | GGCCTGCAGTTAAGGATCAGTCTCCTCTTCAAAG |
| AT2G43010        | <i>PIF4</i>      | pCMX-PL2-NterHA | CGGAATTCATGGAACACCAAGTTGGAG       | GCAGCCCGGGCTAGTGGTCAAACGAGAAC      |
| AT2G43010        | <i>PIF4-N1</i>   | pCMX-PL2-NterHA | CGGAATTCATGGAACACCAAGTTGGAG       | GCAGCCCGGGCTAAGGTGAACTCCGGGGAAC    |
| AT2G43010        | <i>PIF4-N2</i>   | pCMX-PL2-NterHA | CGGAATTCATGGAACACCAAGTTGGAG       | GCAGCCCGGGCTATCGTTGGTTCGACTTGTACC  |
| AT2G43010        | <i>PIF4-N3</i>   | pCMX-PL2-NterHA | CGGAATTCATGGAACACCAAGTTGGAG       | GCAGCCCGGGCTAAGGGTCAGGACAGGCCTTAG  |
| AT2G43010        | <i>PIF4-C1</i>   | pCMX-PL2-NterHA | CGGAATTCGATCATCATGAAGAAGCCCTAAG   | GCAGCCCGGGCTAGTGGTCAAACGAGAAC      |
| AT2G43010        | <i>PIF4-C2</i>   | pCMX-PL2-NterHA | CGGAATTCCTCCTCAAGTCATGCCTC        | GCAGCCCGGGCTAGTGGTCAAACGAGAAC      |
| AT2G43010        | <i>PIF4-C3</i>   | pCMX-PL2-NterHA | CGGAATTCTCAGGATCAAACCGAAGGAG      | GCAGCCCGGGCTAGTGGTCAAACGAGAAC      |
